# Supplementary material
Source: PubMed Central journal article supplement (PMC4187879)

**A**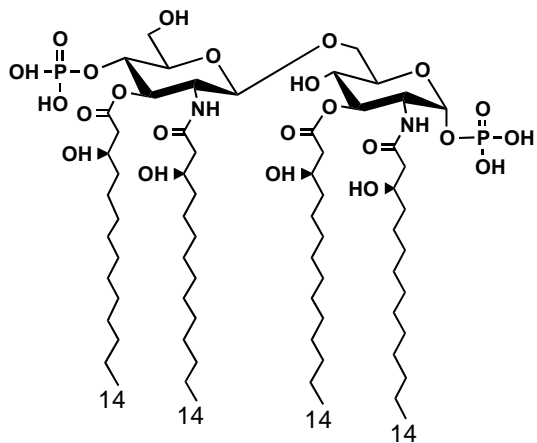

Exact Mass: 1404.85  
[M-H]<sup>-</sup> 1403.84

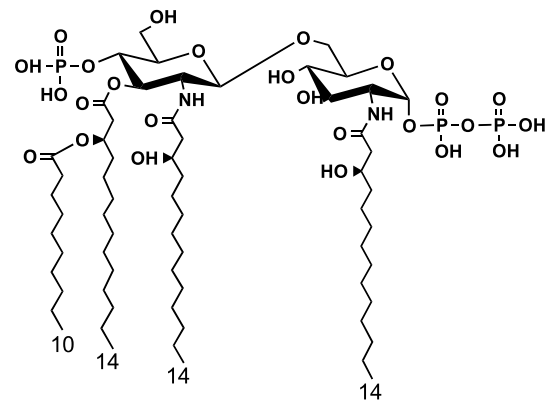

Exact Mass: 1412.76  
[M-H]<sup>-</sup> 1411.76

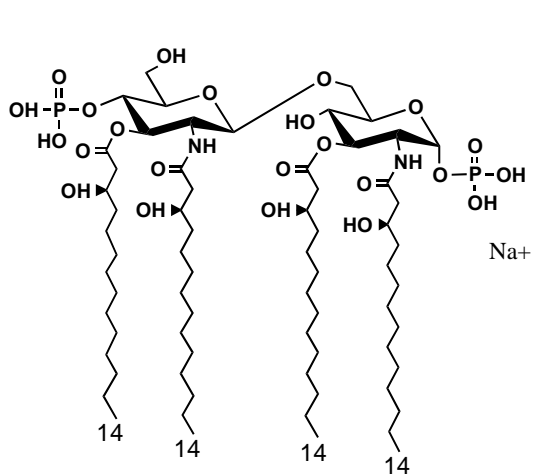

Exact Mass: 1427.84  
[M-H]<sup>-</sup> 1426.84

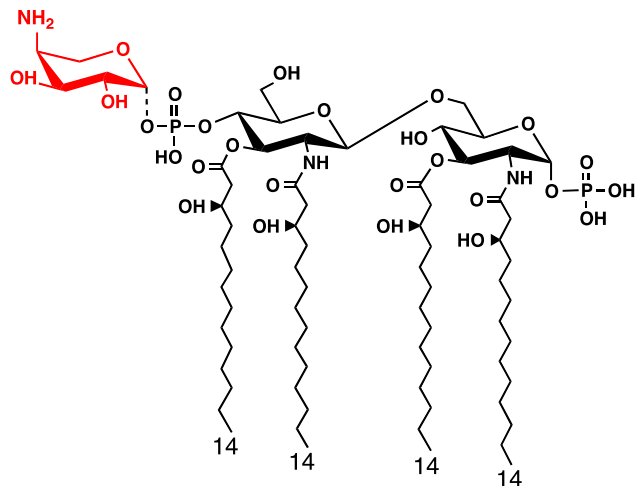

Exact Mass: 1535.91  
[M-H]<sup>-</sup> 1534.91

**B**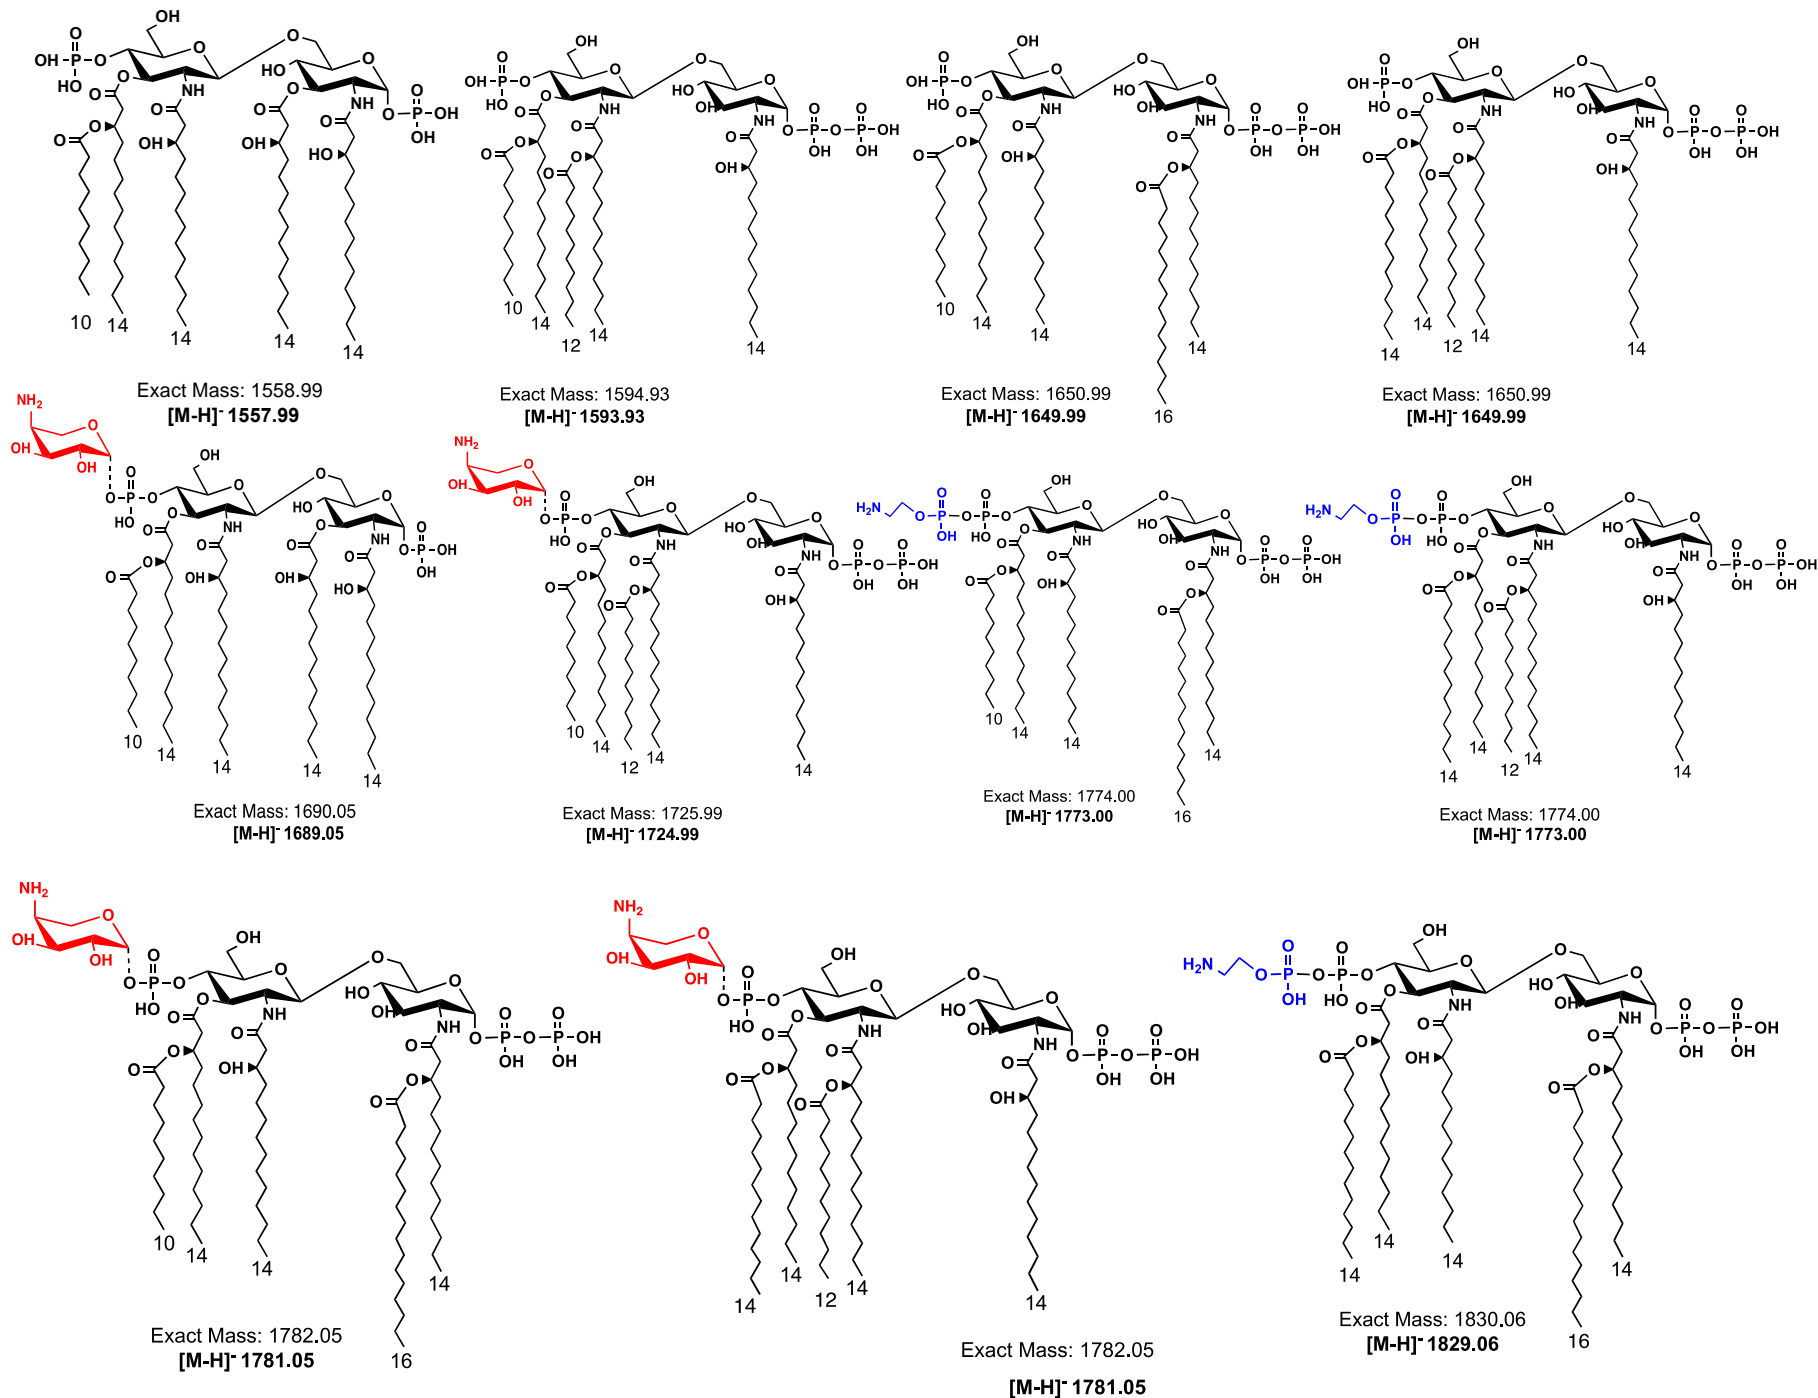

C

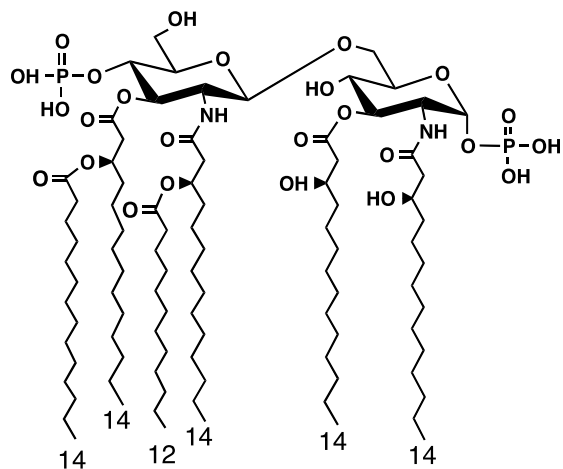

Exact Mass: 1797.22  
**[M-H]<sup>-</sup> 1796.22**

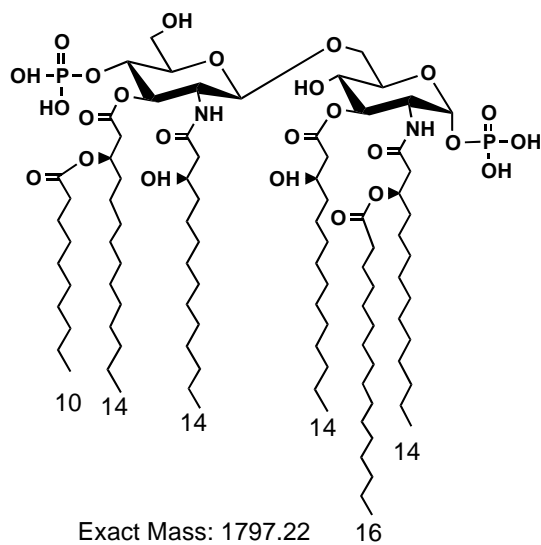

Exact Mass: 1797.22  
**[M-H]<sup>-</sup> 1796.22**

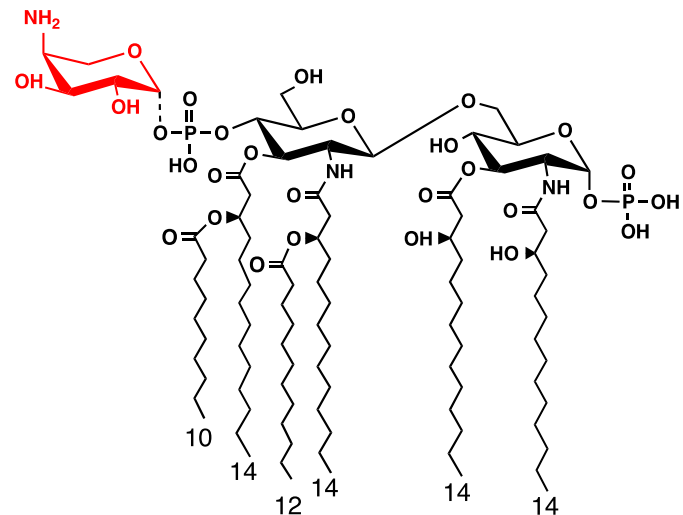

Exact Mass: 1872.22  
**[M-H]<sup>-</sup> 1871.22**

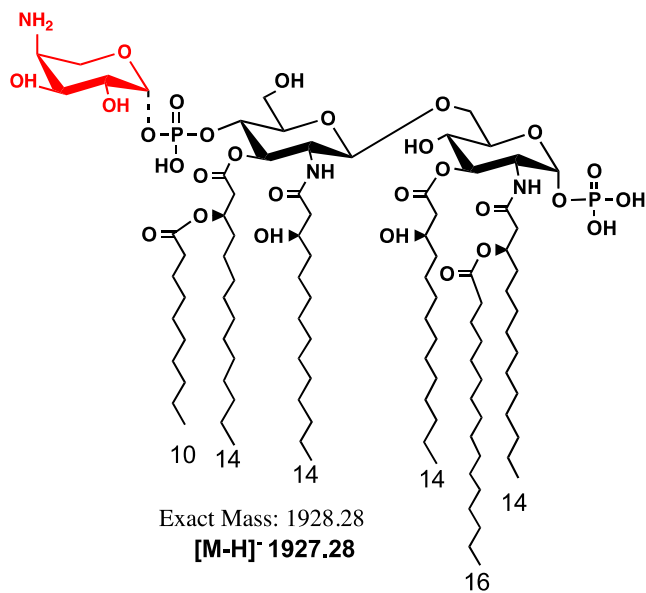

Exact Mass: 1928.28  
**[M-H]<sup>-</sup> 1927.28**

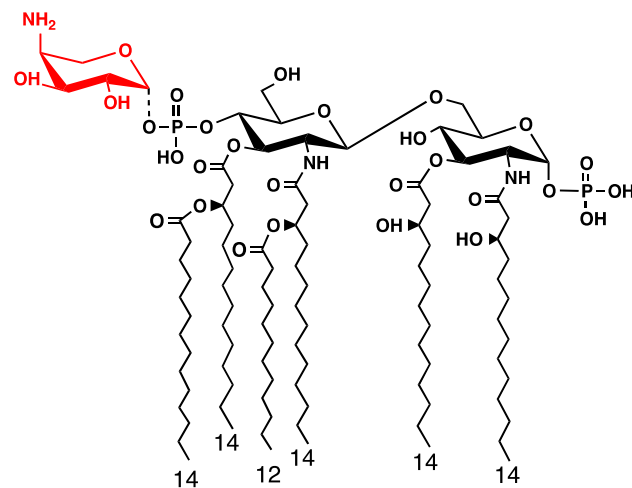

Exact Mass: 1928.28  
**[M-H]<sup>-</sup> 1927.28**

**D**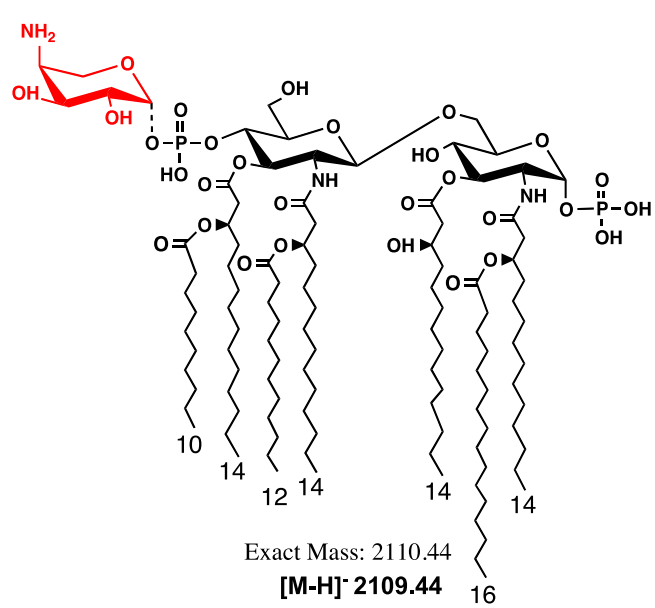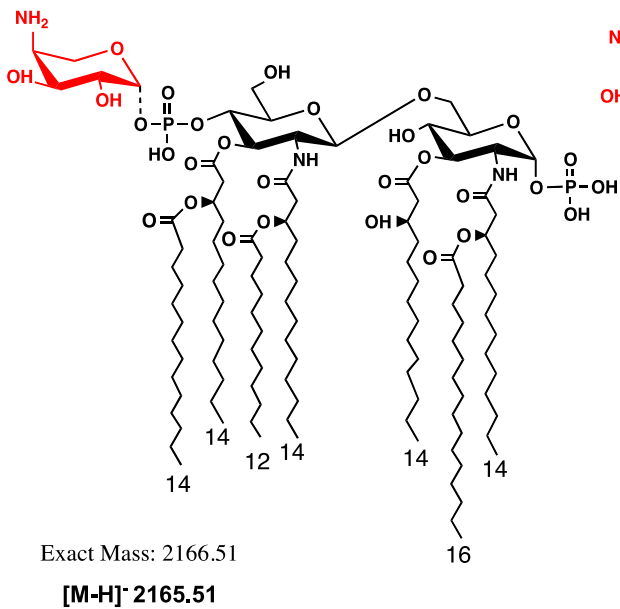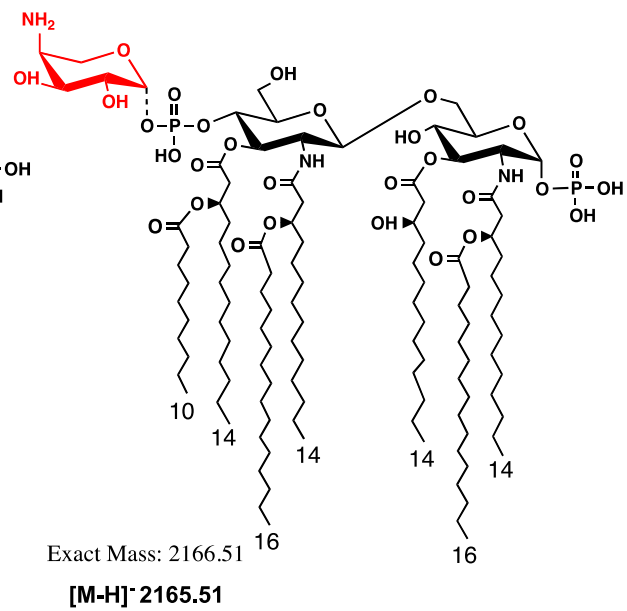

Supplement: IAI.02173-14_zii999090906so3.pdf [file IAI.02173-14_zii999090906so3.pdf]
