# Supplementary material
Source: PubMed Central journal article supplement (PMC4187879)

**A***Y. pseudotuberculosis* 26° C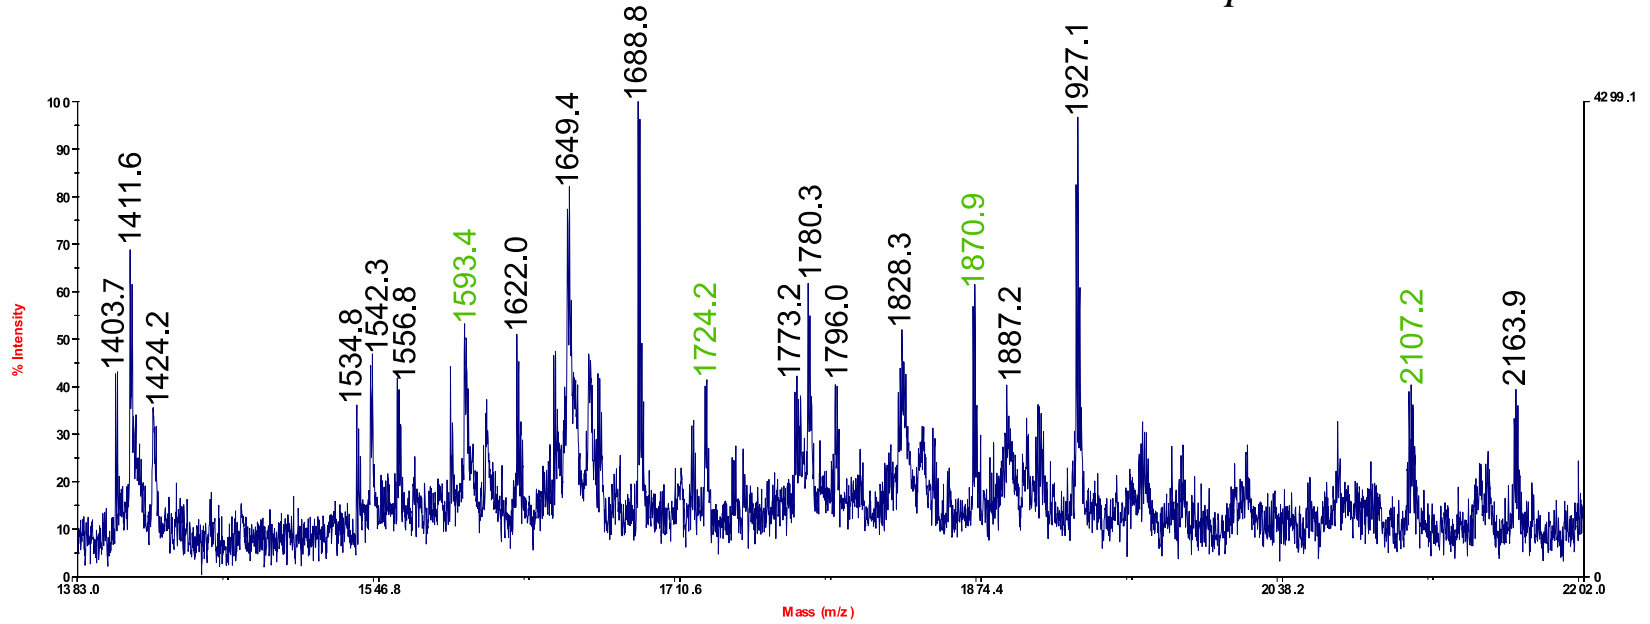*Y. pseudotuberculosis* 37° C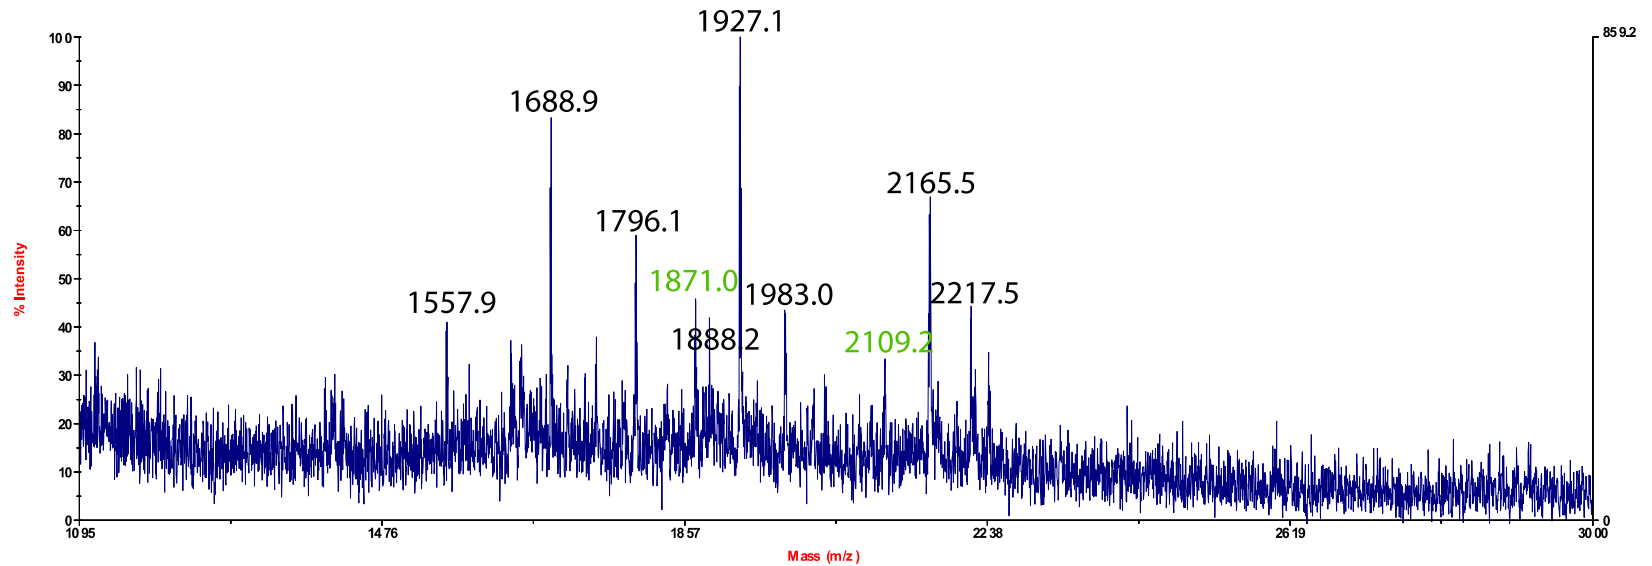

**B**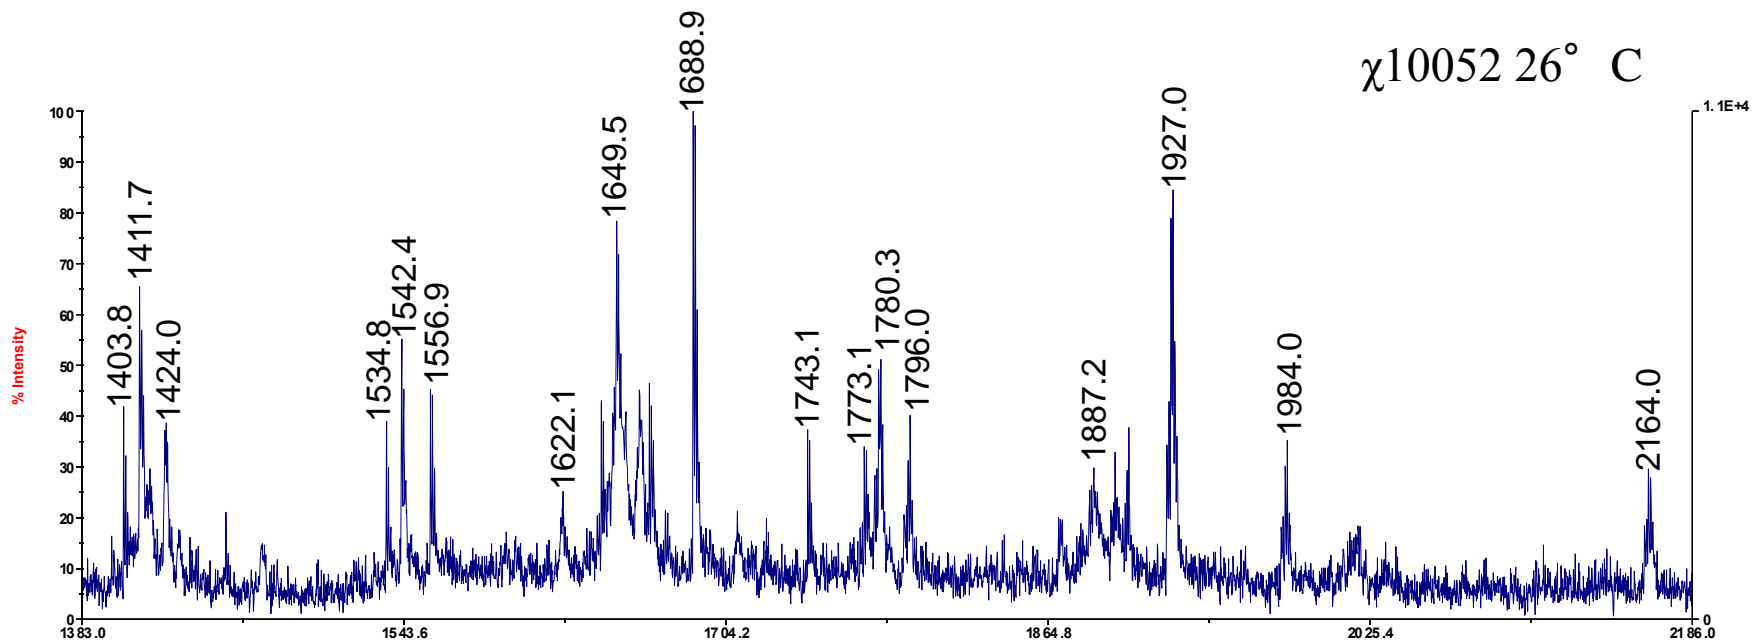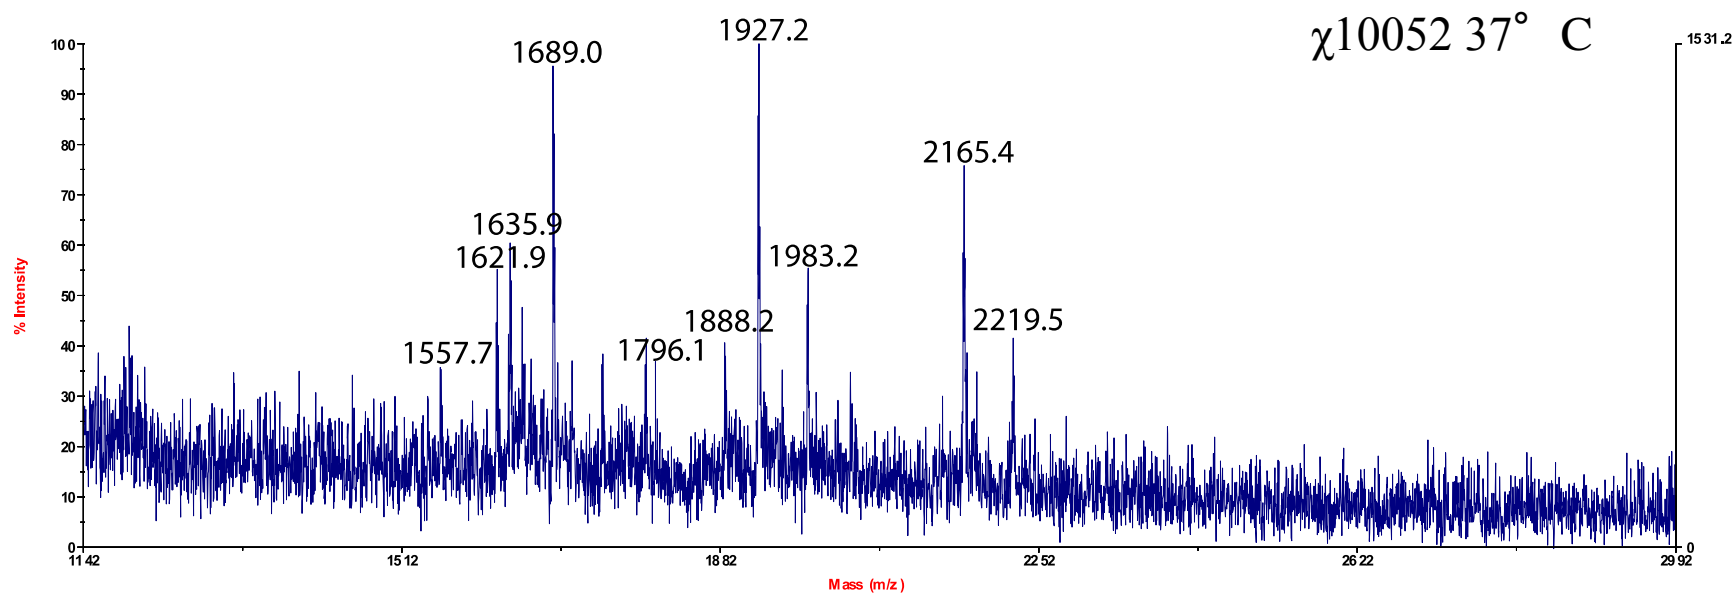

C

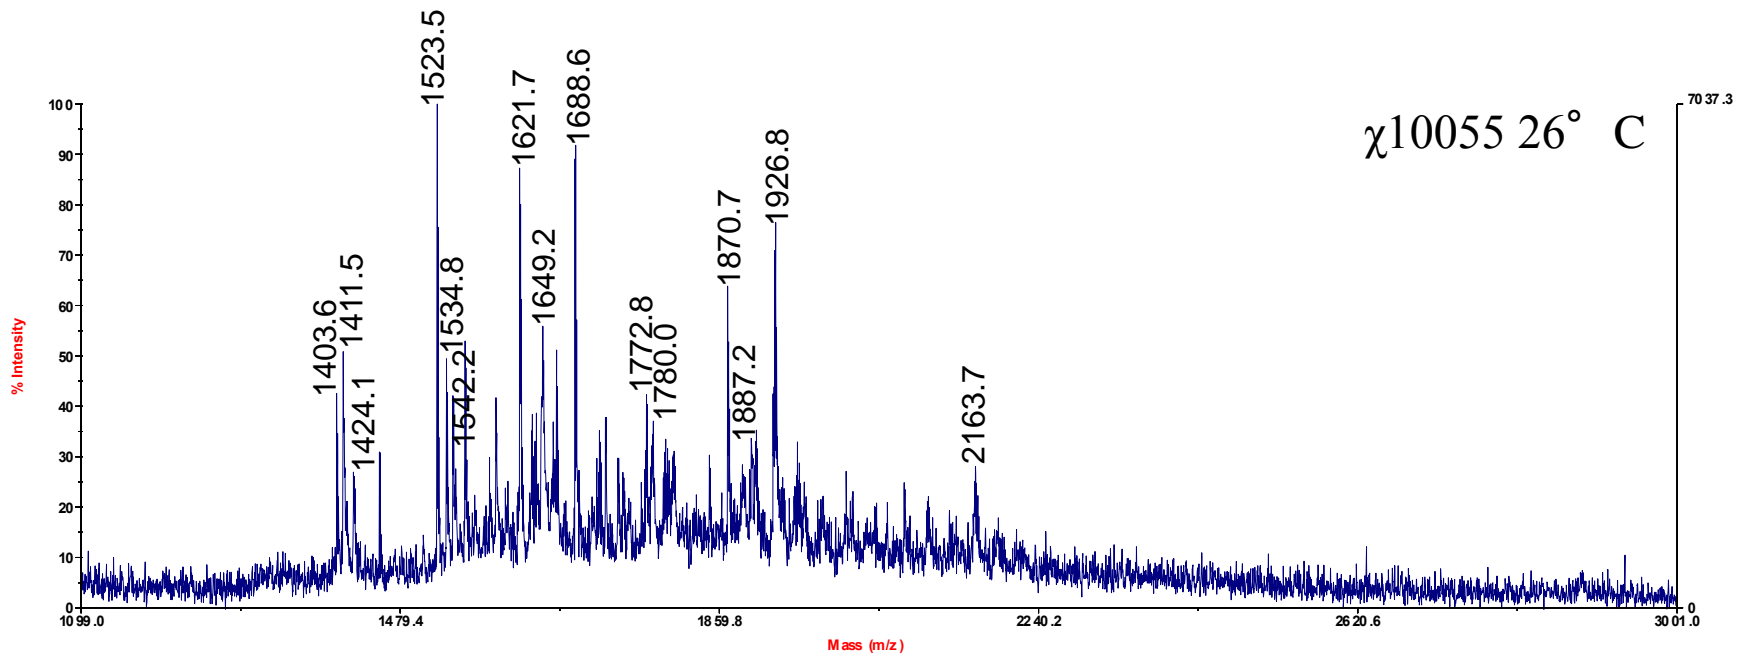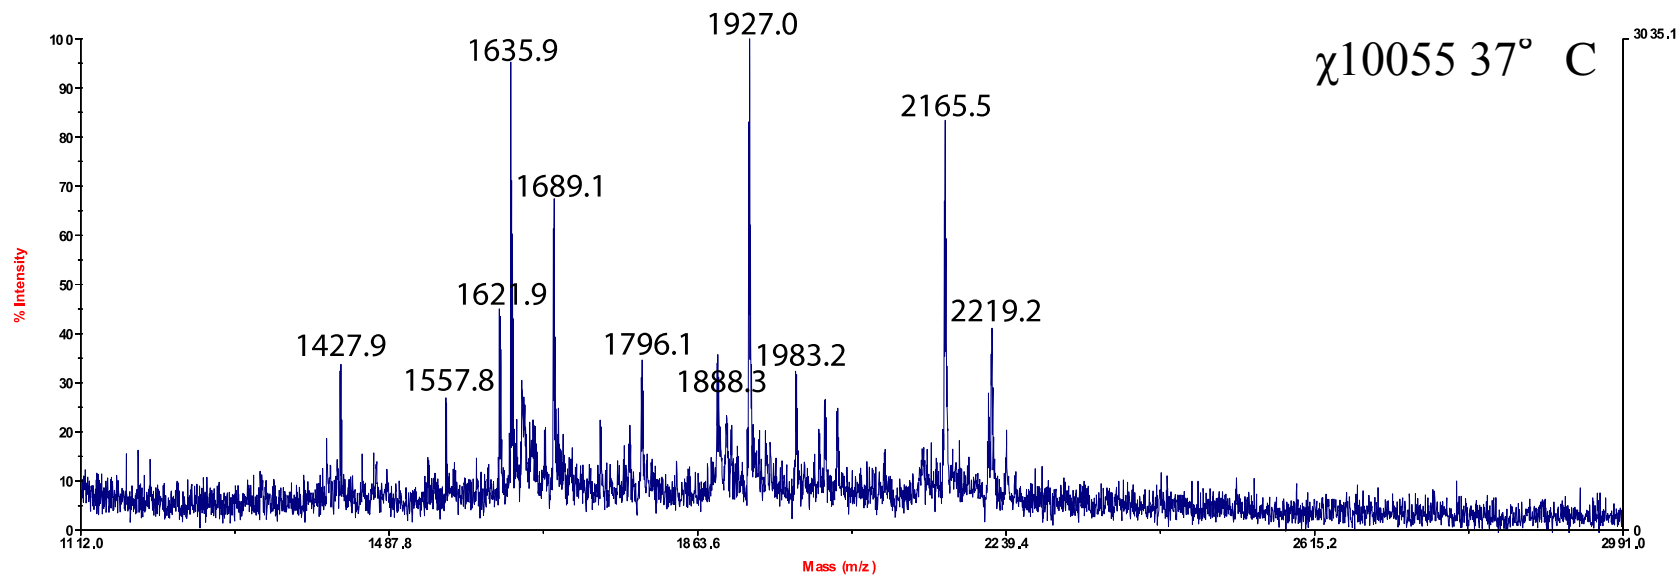

Supplement: IAI.02173-14_zii999090906so2.pdf [file IAI.02173-14_zii999090906so2.pdf]

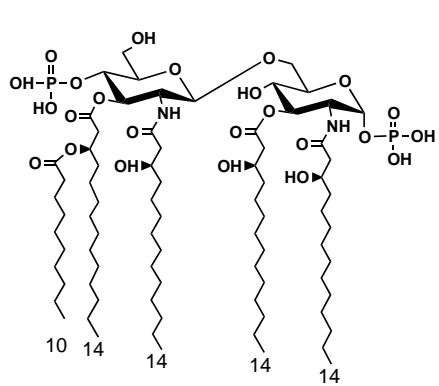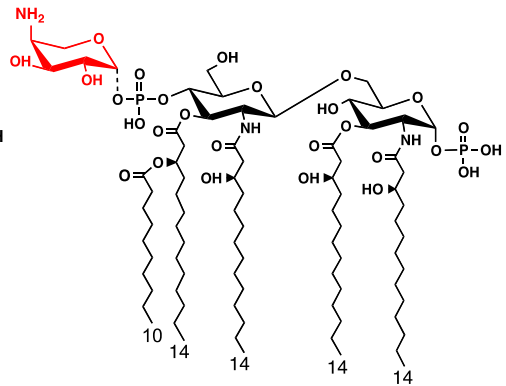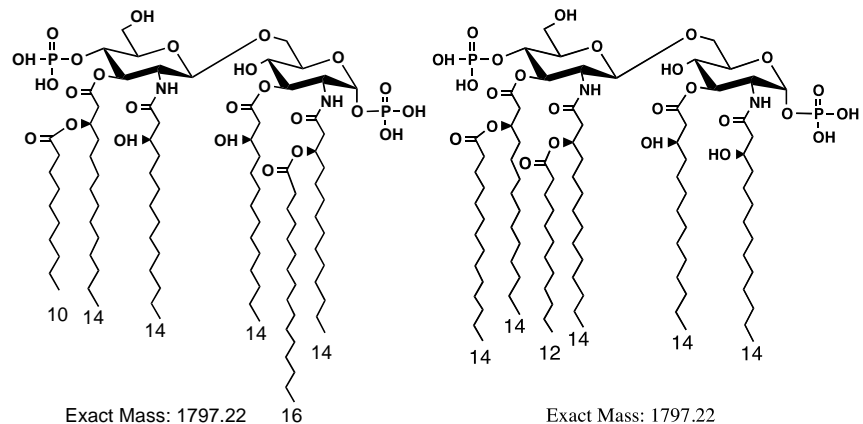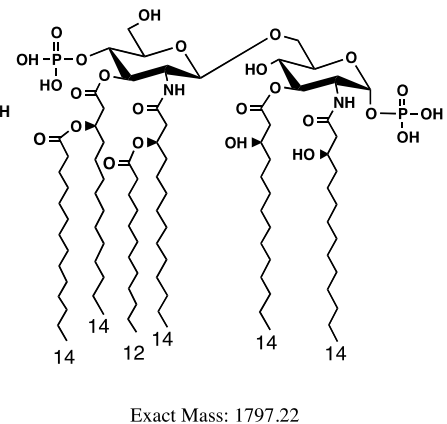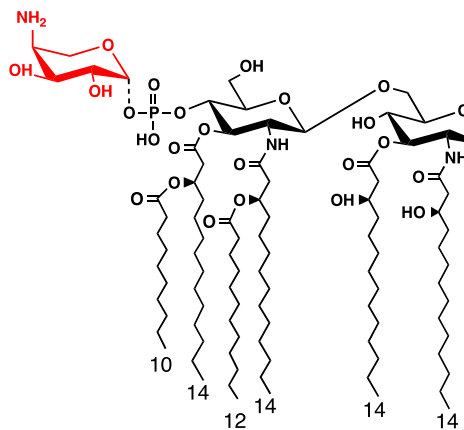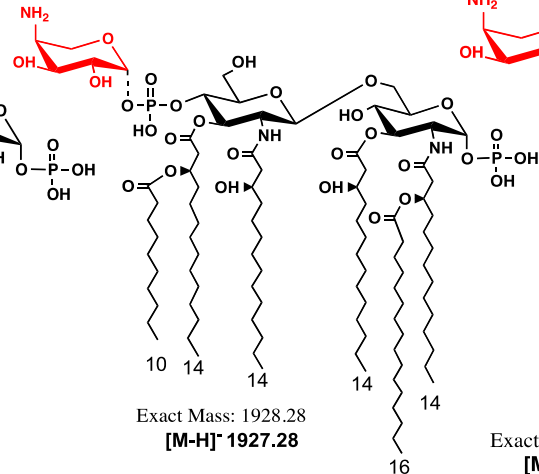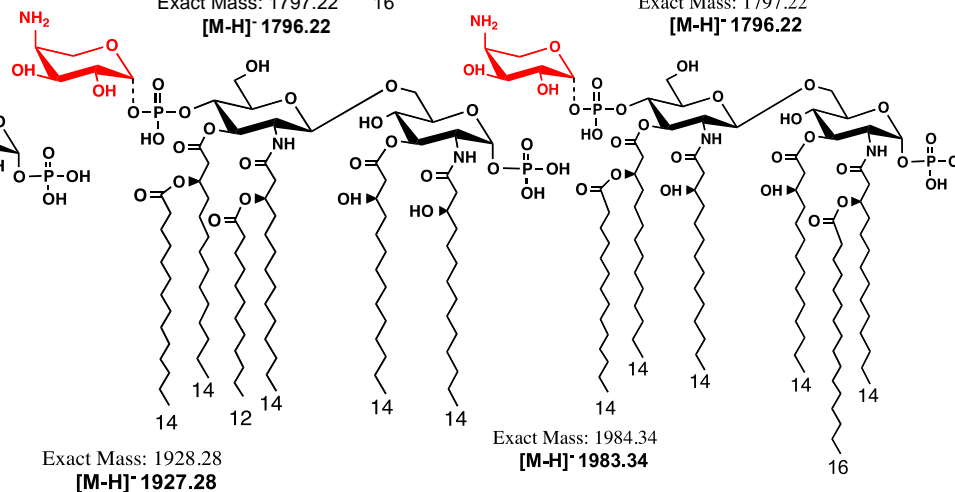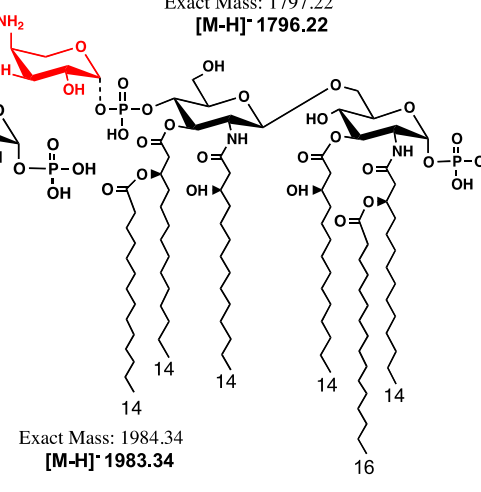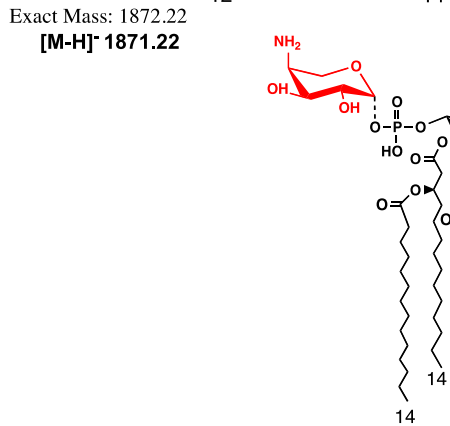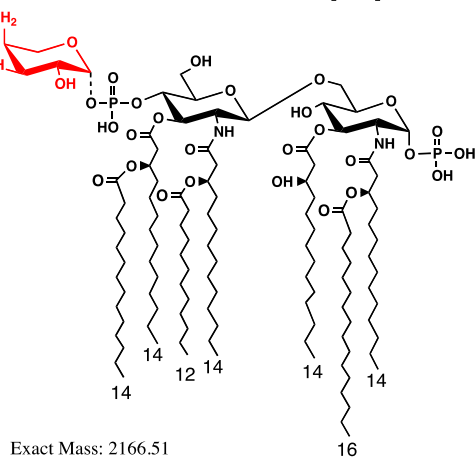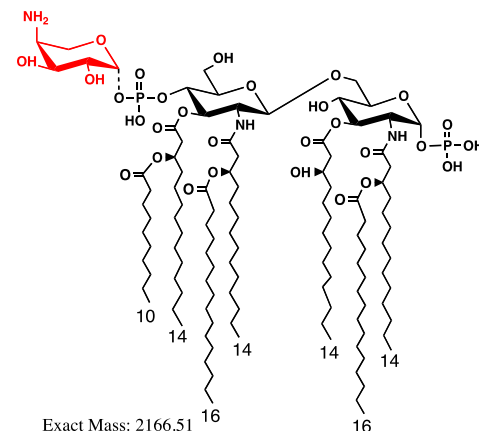

Supplement: IAI.02173-14_zii999090906so4.pdf [file IAI.02173-14_zii999090906so4.pdf]

**A**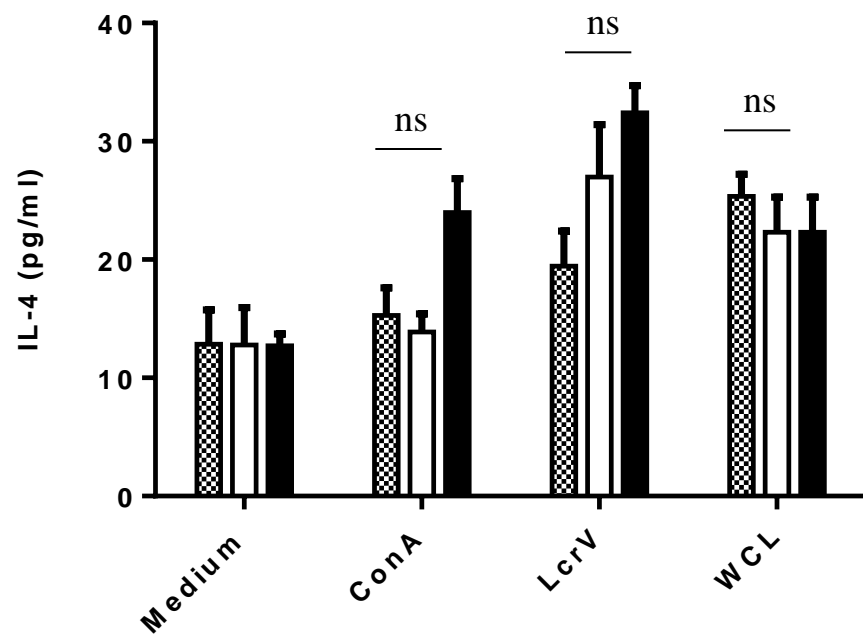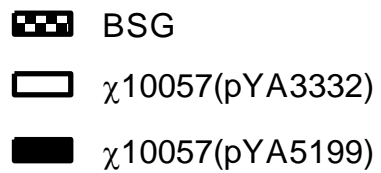**B**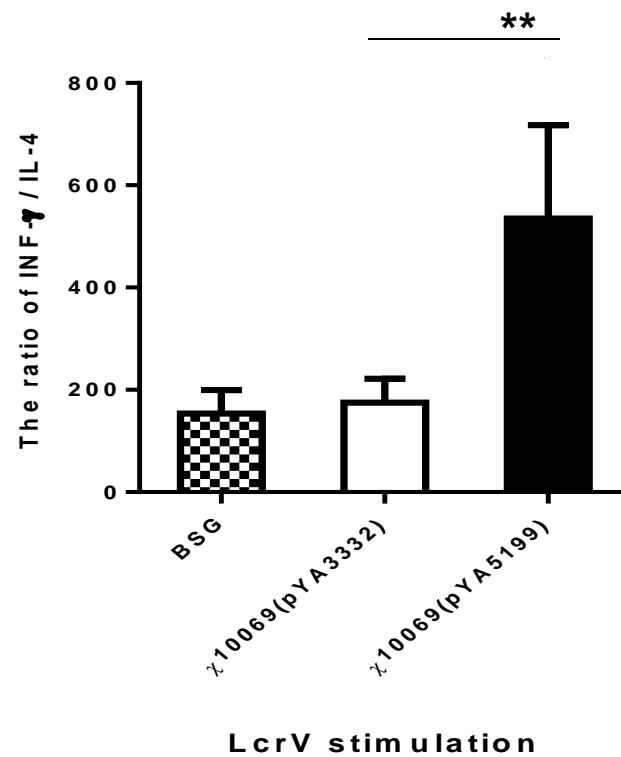

Supplement: IAI.02173-14_zii999090906so5.pdf [file IAI.02173-14_zii999090906so5.pdf]
